# Supplementary material
Source: PubMed Central journal article supplement (PMC5626586)

Figure S1

A

**PDTC/ATC<sup>1</sup>**  
(10%)

pG8E-PDTC  
pG9R-ATC  
pK10E-PDTC  
pR31H-PDTC

pA113\_splice  
ATC  
PDTC

**PTC(TCGA)<sup>2</sup>**  
(1%)

pG8E  
pG9D  
pG9R

pA113\_splice

**FNAT**  
(12%)

pP2R  
pG8R  
pK10E

pA113\_splice

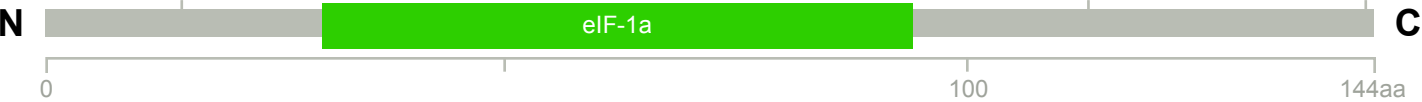

B

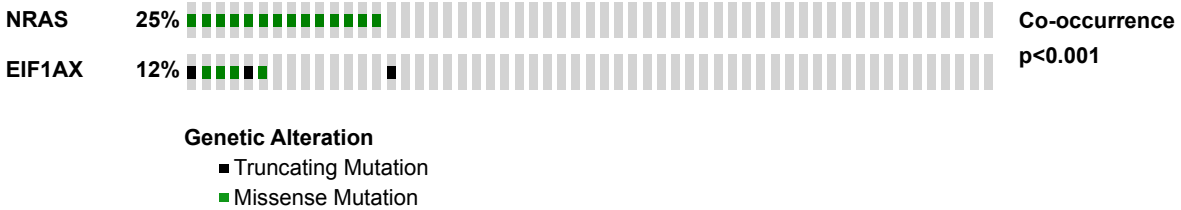

Supplement: NIHMS887099-supplement-1.pdf [file NIHMS887099-supplement-1.pdf]
