# Supplementary material
Source: PubMed Central journal article supplement (PMC5626586)

Figure S2

A. DNA Damage Pathway

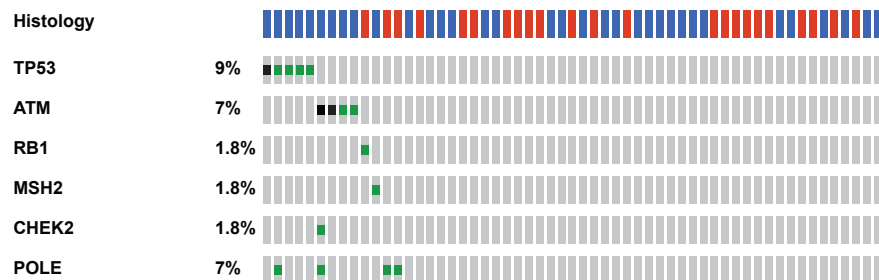

B. RAS PIK3 AKT MTOR Pathway

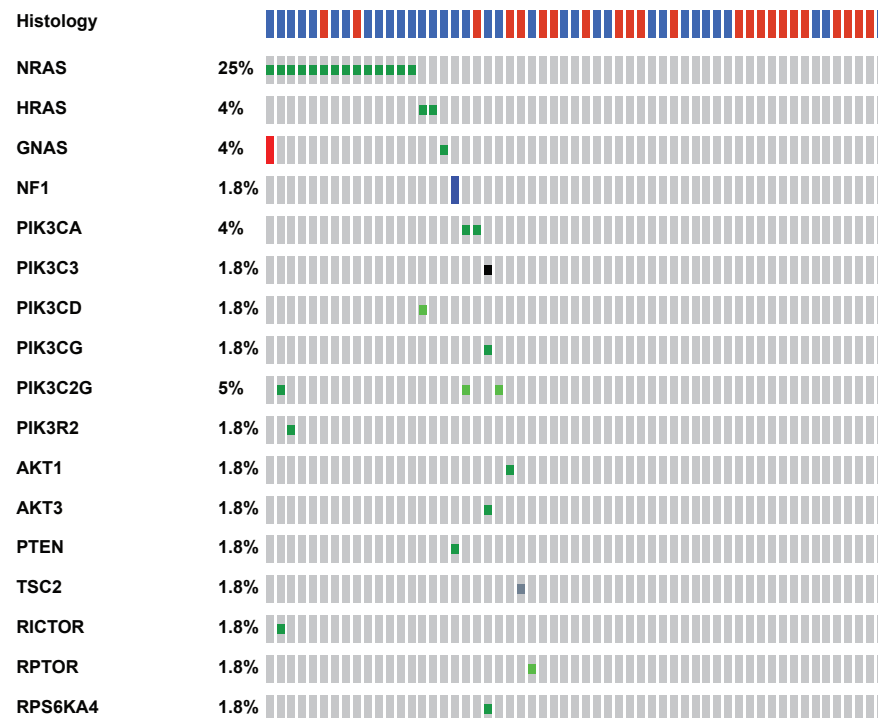

C. Chromatin Modifying Pathway

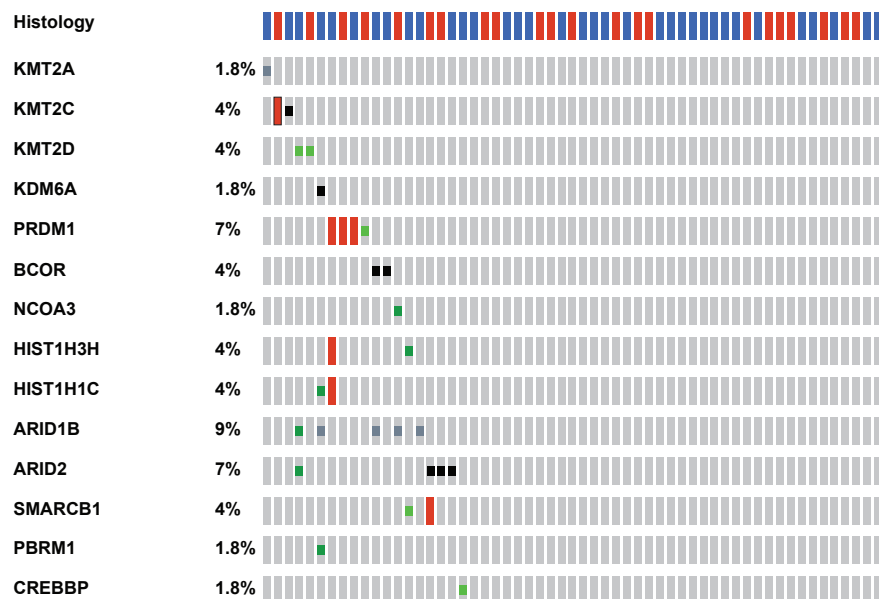

D. RTKs

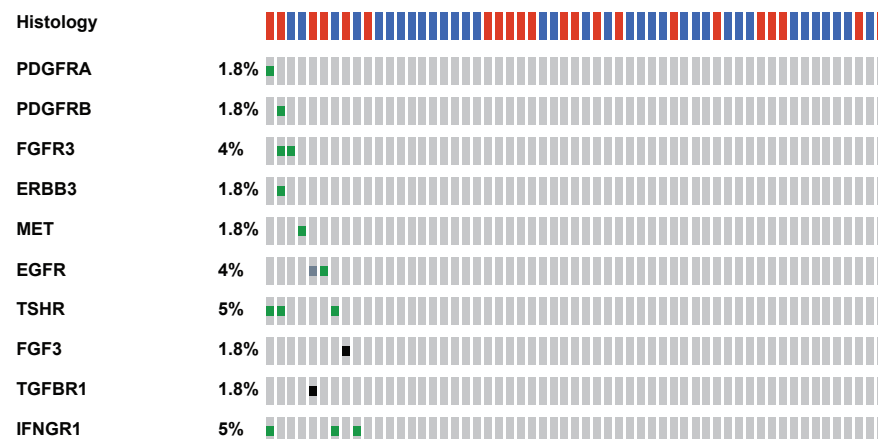

Supplement: NIHMS887099-supplement-2.pdf [file NIHMS887099-supplement-2.pdf]

Figure S3

A. WDTC

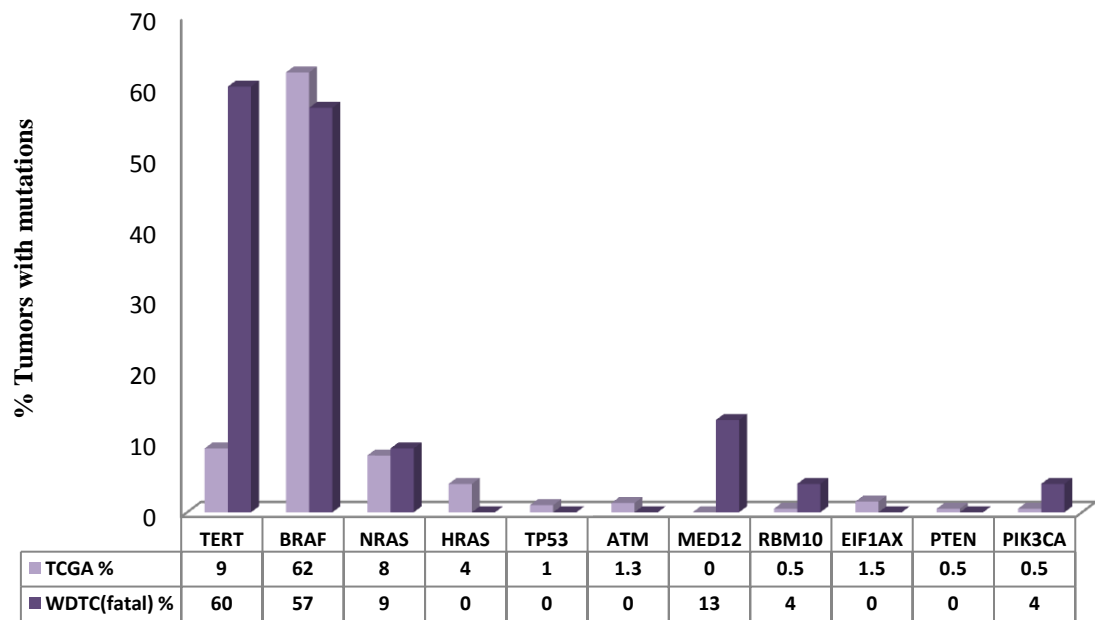

B. PDTC

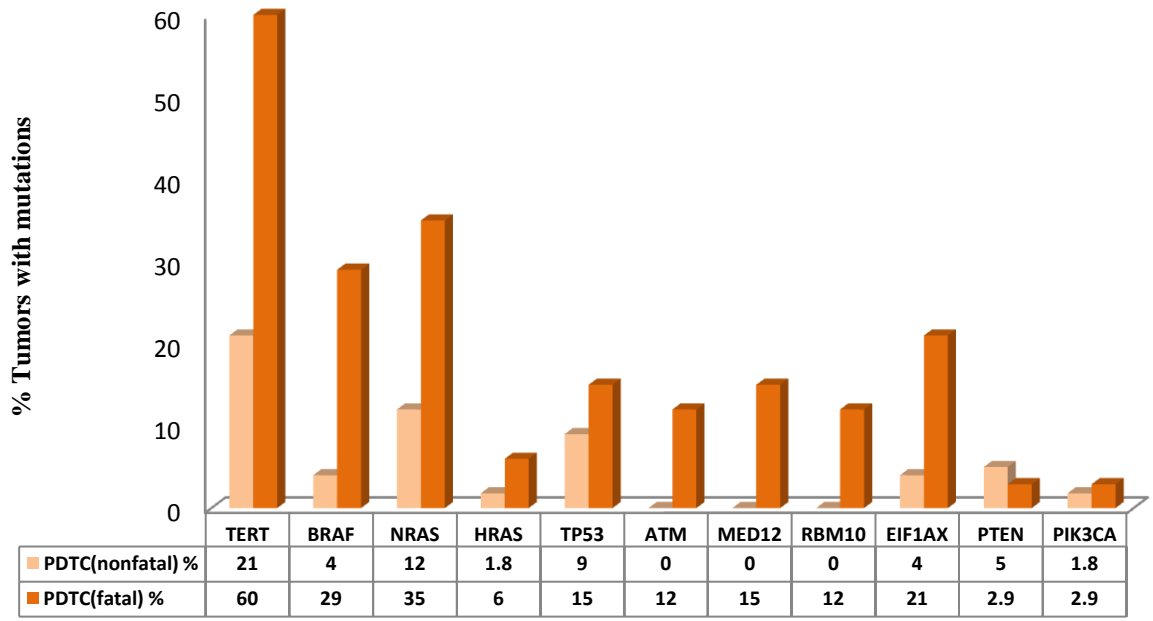

Supplement: NIHMS887099-supplement-3.pdf [file NIHMS887099-supplement-3.pdf]
